# Supplementary material for: Surface Coatings Modulate the Differences in the Adhesion Forces of Eukaryotic and Prokaryotic Cells as Detected by Single Cell Force Microscopy
Source: Int J Biomater. 2019 Apr 1;2019:7024259. doi: 10.1155/2019/7024259 (PMC6463582; doi:10.1155/2019/7024259)
Supplement: Supplementary Materials — Tables S2a-e and S3a-e summarize the results of two-way ANOVA analyses of the statistical differences in the measurement MDFs and in the specific MDFs. Figures S1 and S2 show the results of the alternative normalization method according to equations (5) and (6). [file 7024259.f1.zip]

Archive with 3 entries (2 files):
- 7024259.f1/
- 7024259.f1/7024259.f1.xlsx
- 7024259.f1/7024259.f2.pdf
