# Supplementary material for: Surface Coatings Modulate the Differences in the Adhesion Forces of Eukaryotic and Prokaryotic Cells as Detected by Single Cell Force Microscopy
Source: Int J Biomater. 2019 Apr 1;2019:7024259. doi: 10.1155/2019/7024259 (PMC6463582; doi:10.1155/2019/7024259)
Supplement: Supplementary Materials — Tables S2a-e and S3a-e summarize the results of two-way ANOVA analyses of the statistical differences in the measurement MDFs and in the specific MDFs. Figures S1 and S2 show the results of the alternative normalization method according to equations (5) and (6). [file 7024259.f1.zip › 7024259.f1/7024259.f1.xlsx]

## Sheet: Tabelle1
Tab. S1: MDF measurement data. The single cells are numbered from 1 to n with Scc cells (n=10), MC3T3 cells (n=14) and PNCs (n=12). The units for the MDF values and contact times are nN and seconds, respectively.
surface coating	silicon nitride			PEI			PEI Lamin			PDL laminin
contact time [s]	1	2	5	1	2	5	1	2	5	1	2	5
Scc cell #	MDF [nN]			MDF [nN]			MDF [nN]			MDF [nN]
1	5.13459	14.3587	18.6153		7.72914			1.10089			0.310997
2	2.6588	2.13466	3.49277	8.40687	10.4325	7.15804	0.833729	0.756917	1.15677	0.463585	0.767915	0.429486
3	1.84785	1.96329	2.26672	4.13439	5.28847	2.71277	1.02786	0.457471	1.16698	0.338502	0.481397	0.360728
4	16.5688	19.3282	25.3438	19.2655	22.6856	19.5183	10.3119	3.64634	4.99338	1.43768	1.53602	3.04203
5	6.97871	8.53034	20.0962	12.623	33.3176	7.16201	3.44048	16.5406	19.5504	0.574655	3.61133	0.95825
6	7.01353	7.98911	12.7999	11.1074	17.931	9.13778	3.90349	5.35033	6.71687	0.703606	1.59916	1.19762
7	2.25332	2.04898	2.87975	6.27063	7.86048	4.9354	0.930795	0.607194	1.16188	0.401044	0.624656	0.395107
8	2.38842	2.53764	2.92984	5.34387	6.83559	3.50637	1.32855	0.591302	1.50837	0.437529	0.622226	0.466257
9	5.67277	7.36136	11.053	9.59309	14.0101	7.73296	3.11097	3.63138	5.17923	0.622372	1.19421	0.978498
10	4.90509	6.14283	8.75637	4.85986	9.2265	5.24292	3.1633	5.15667	6.22002	0.351029	1.01518	0.893819
mean MDF [nN]	5.54218	7.23951	10.8234	9.06718	13.5317	7.45628	3.11678	3.78391	5.29487	0.592222	1.17631	0.969089
std. deviation	4.11251	5.50646	7.86218	4.53678	8.37628	4.68957	2.78981	4.63491	5.49529	0.321109	0.909593	0.788723
surface coating	silicon nitride			PEI			PEI Lamin			PDL laminin
contact time [s]	1	2	5	1	2	5	1	2	5	1	2	5
MC3T3 cell #	MDF [nN]			MDF [nN]			MDF [nN]			MDF [nN]
1	0.82939	1.58534	2.33168			5.44271			4.24424			2.72193
2	8.2939	15.8534	23.3168	12.1799	10.231	24.7115	1.74222	3.46867	5.33941	5.71044	10.851	17.4287
3	0.0313876	0.578652	0.648631				0.211672	0.230768	0.325416	0.187895	0.164857	0.235254
4	4.61468	7.85538	12.5197	9.32361	13.7329	21.2929	1.72855	1.18068	1.29348
5	0.668965	0.704457	0.842	1.18619	1.29372	1.88332	0.46285	0.518168	0.633456	0.27135	0.283369	0.302663
6	0.558717	0.461048	0.563755				0.435136	0.289867
7	1.7228	2.12393	1.5286				0.277734	0.518168	0.947546	0.280037	0.30544	0.438839
8	0.470575	1.14712	1.86122	5.25415			2.15071			0.459807
9	4.47292	25.8086	27.0861	3.1405	9.36708		0.99478	0.955719		6.09098	9.85669
10	3.29776	22.9194	21.051	16.8171	13.7685		2.05783	1.36796		1.67286	3.71694
11			0.993281			2.92181			0.857722			0.846197
12	0.875053	41.3994	68.961	17.3522	9.66116	5.63228	23.2646	2.48993		4.44638	4.91618	7.44729
13	1.55298	34.7911	15.5975	25.3904	13.7028	3.46154	0.868218	0.837613		0.878017	0.307832	1.68394
14	3.03116	9.80363	6.56815	4.8045	4.74015	5.20849	1.06168	2.31802	3.32609	1.06168	1.46918	4.27752
mean MDF [nN]	2.34002	12.6947	13.1335	10.6054	9.56214	8.81932	2.938	1.28869	2.12092	2.10594	3.54127	3.93137
std. deviation	2.26657	13.6979	17.9644	7.55391	4.24774	8.32423	6.16399	0.995049	1.78231	2.24109	3.97871	5.26749
surface coating	silicon nitride			PEI			PEI Lamin			PDL laminin
contact time [s]	1	2	5	1	2	5	1	2	5	1	2	5
PNC cell #	MDF [nN]			MDF [nN]			MDF [nN]			MDF [nN]
1	5.5654	5.04094	3.66323	0.476032	0.287216	0.233003	0.944641	1.01645	1.558	0.481767	0.575073	0.416605
2	0.163332	0.135511	0.155665	0.0568504	0.146161	0.113802	0.160281	0.144431	0.138356
3	1.84627	1.70127	1.063	0.340905	0.352693	0.317513
4	0.32582	0.369878	0.318947	0.731512	0.403916	0.406445	0.38459	0.410682	0.402892	0.224692	0.278103	0.326216
5	0.787465	1.08329	0.995056				0.449715	0.431266	0.300103
6	0.972142	0.91189	0.903393				0.383503	0.384037	0.308168	0.350485	0.370215	0.363035
7	5.9003	7.67983	11.5856	3.94001	0.779992	5.04023	1.4278	1.42499	0.641501	0.359727	0.33061	0.335215
8	2.20751	1.5283	3.21809	5.73683	2.96855	0.712524	0.653253	0.555342	0.92441	0.579401	0.319856	0.451776
9	1.53244	1.84275	1.38594	8.91494	3.97831	4.25933	0.724465	0.805062	0.786501	0.443224	0.312432	0.421143
10	3.7183	5.88524	6.52324	7.62025	8.84038	9.9587	1.51716	1.30457	1.57001	0.82146	1.42259	0.353353
11	1.65088	5.4026	5.14467	9.06071	9.88329	3.1212	0.406203	0.774564	1.1343	0.234663	0.279569	0.387057
12	2.46252	0.868428	1.04888				0.899225	0.564292	0.791696	0.172932	0.15393	0.203312
mean MDF [nN]	2.26103	2.70416	3.00047	4.09756	3.07117	2.68475	0.722804	0.710517	0.777812	0.407595	0.449153	0.361968
std. deviation	1.81162	2.44958	3.22839	3.61858	3.59911	3.13464	0.419302	0.382621	0.467287	0.191935	0.359677	0.0686562
